# Supplementary material for: The conserved HIV-1 spacer peptide 2 triggers matrix lattice maturation
Source: Springer Nature journal article supplement (doi:10.1038/s41586-025-08624-9), 2025-02-26
Supplement: MOESM1 [file 41586_2025_8624_MOESM1_ESM.pdf]

---

**Supplementary information**

---

**The conserved HIV-1 spacer peptide 2  
triggers matrix lattice maturation**

---

In the format provided by the  
authors and unedited

## Supplementary Figure 1

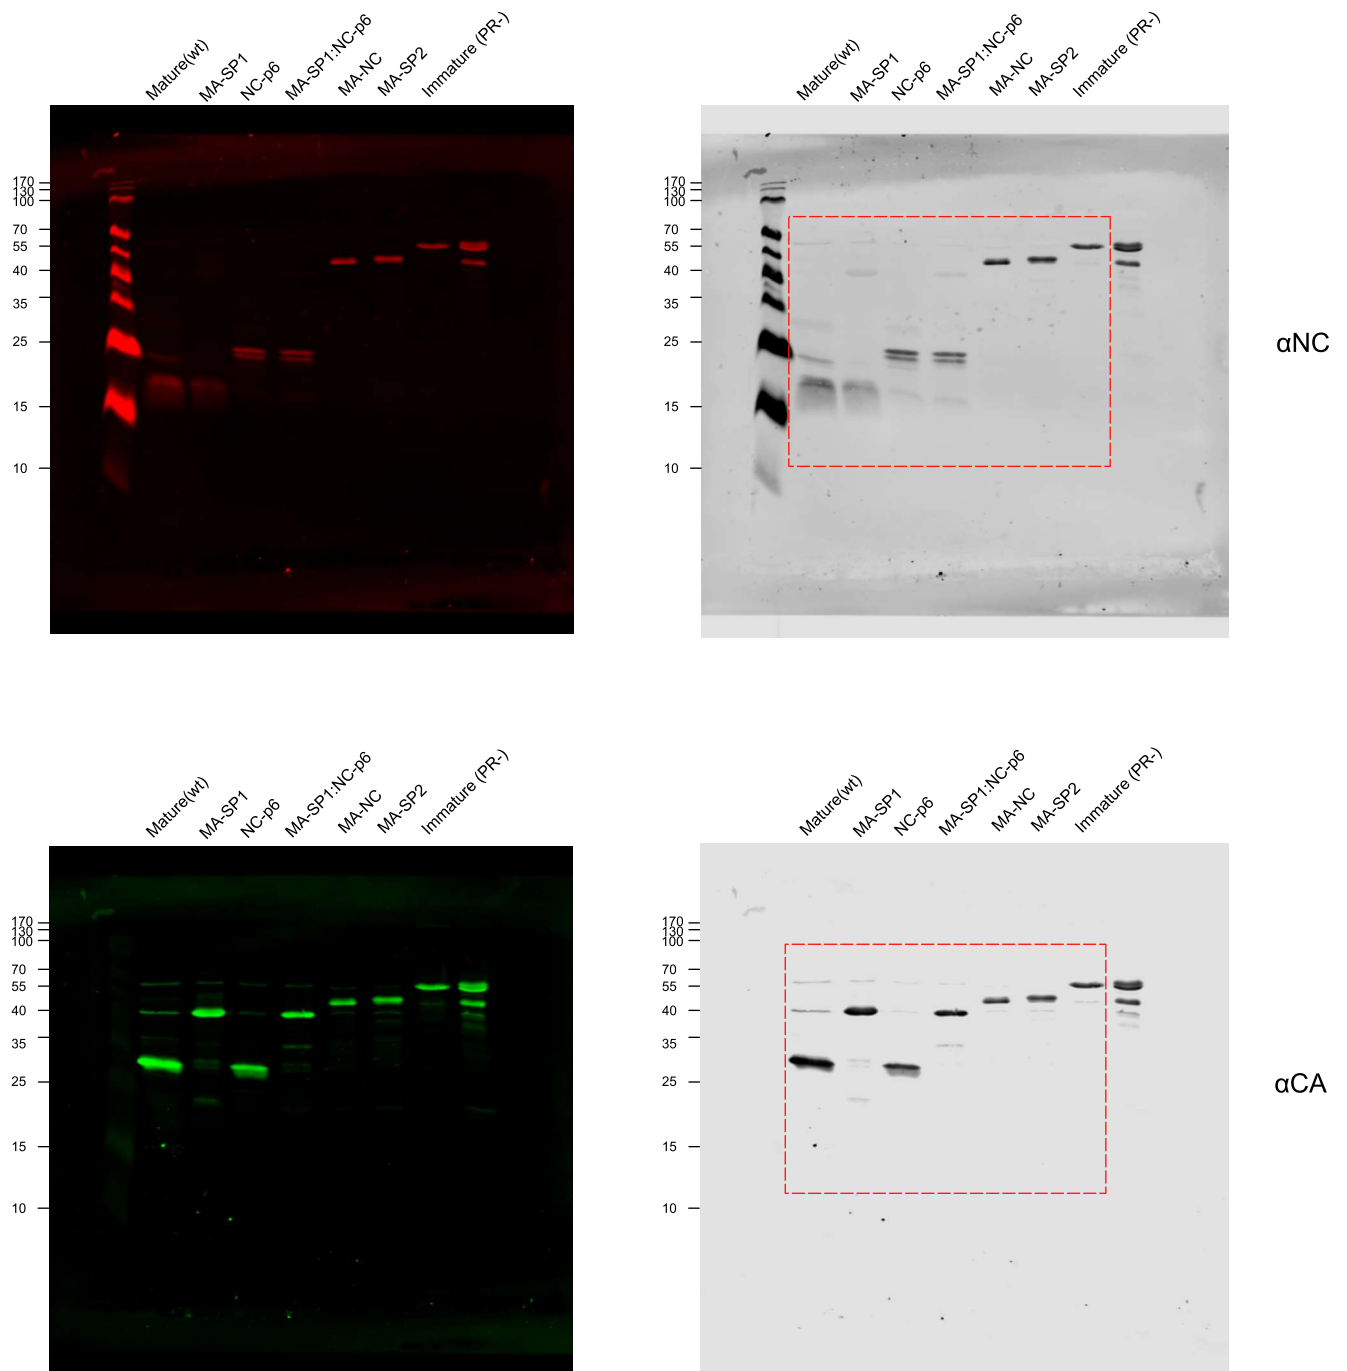

Uncropped western blots from extended data figure 2a.
